# Supplementary material for: Genetic Mutation in Korean Patients of Sudden Cardiac Arrest as a Surrogating Marker of Idiopathic Ventricular Arrhythmia
Source: PubMed Central journal article supplement — J Korean Med Sci. 2013 Jul 3;28(7):1021–6. doi: 10.3346/jkms.2013.28.7.1021 (PMC3708072; doi:10.3346/jkms.2013.28.7.1021), 2013-07-03
Supplement: jkms-28-1021-s001.pdf [file jkms-28-1021-s001.pdf]

**Supplemental Table 1.** Primer sequences for *KCNQ1* (NM\_000218.2)

| Exon | Forward primer        | Reverse primer        | PCR product size (bp) |
|------|-----------------------|-----------------------|-----------------------|
| 1-1  | AGCGGGATAGATGACACGAG  | CAAGGTCGGAGGCAACTG    | 661                   |
| 1-2  | AGGCCCTCCTCGTTATGG    | CTTCCTCCCTCCTCTGCTC   | 524                   |
| 2    | AATGGATGACTGGGTTTTCG  | TATCAGGGCAGGACCAATGT  | 363                   |
| 3    | GCTGTTCTCAGGGTGTCTT   | GAGTGCAGAGGCTGCTGAG   | 426                   |
| 4    | ACGAGAGCAGGGTGTATGCT  | CTGAGGCATCTTGGGTTGAG  | 372                   |
| 5    | CCTGTCGGGATGGACATATAC | CTGTCCTAGTGTGGGCTGCT  | 330                   |
| 6    | GCCACTTACCGGAGTTGTGA  | GCACAGGTTTGTGGACAGAG  | 465                   |
| 7    | GCTCTGTTCCCTGGTCTTTC  | CGTAAGTGGGCTGCTCACA   | 367                   |
| 8    | TCCAGCACTGACCATACCTG  | AAGCAGAGTATGCCCCACAG  | 346                   |
| 9    | CCATGTCAAGCTGTGACTC   | GGAACCTAGCATCGGGTGA   | 444                   |
| 10   | CTGCCCTGTCTCTGTGTGAA  | GAAGCTCCACCCTCTGTCTG  | 453                   |
| 11   | CACTTTGGGGCCATCTTAAA  | CTCTCCTCTCTTGCCTGGTG  | 479                   |
| 12   | CATCCCATGGAGTTGAACACT | CTCCACTATGGGAGGAGAG   | 309                   |
| 13   | AACCAGGCTTATGCCATCAC  | GGTGGTTGAGAGGCAAGAAC  | 362                   |
| 14   | CTTCCGAGATCCCTGCTC    | CCCTGGCTTTCATTTTCATGT | 396                   |
| 15   | ACCGTACCACCCTGGTATT   | CTTCACGTTACACGCAGAC   | 326                   |
| 16   | ATTCCTTGCACACACAGG    | GCTCTTCTCTGCGCCTTT    | 543                   |

All primer sequences are 5' to 3' direction. Annealing temperature for all primer pairs is 60°C.

**Supplemental Table 2.** Primer sequences for *KCNH2* (NM\_000238.3)

| Exon | Forward primer       | Reverse primer       | PCR product size (bp) |
|------|----------------------|----------------------|-----------------------|
| 1    | CCCGCAGTCCAGTCTTGG   | ACACACTCCGATCCCAAAAG | 478                   |
| 2    | GAGTGGAGAATGTGGGAAG  | GTCACACCCACAGAAACC   | 459                   |
| 3    | CAGATTGAGGGAGCCATAA  | CACTTCCACCTCCAAGG    | 500                   |
| 4-1  | GTTCCCTCCTTCCCTTACC  | CATGGCCTCGATGTCGTC   | 507                   |
| 4-2  | GGTGGACGTGGACCTGAC   | AGCGCAACAAGCCACTTAAT | 499                   |
| 5    | CCCTGGTCTCTGAGCTGAC  | CTCTGGATCACAGCCACTC  | 420                   |
| 6    | CTCCTCCTCATTCTGCTTGG | CCTTGCCACCATGTCTCTCT | 682                   |
| 7    | TGTGGGCTTACCTCTTAGG  | CAGCCTCAGTTTCTCCAAC  | 605                   |
| 8    | CTGGAGCGCAGATGTACAAG | AAGGGCTTCCATTTCTCAT  | 506                   |
| 9    | AGGCCTGGAGGTTGAGATTT | AGCCCCAGTGACTGCATATT | 452                   |
| 10   | AGCTGAGGGGACATGCTCT  | TGGGACTTTTGTAGGCTGCT | 448                   |
| 11   | TTCCCTGTCTGTCAAATGG  | ATCTGGACAGCTGGGGTGT  | 463                   |
| 12   | TTCCCTGCCAGTCCCTCTCT | AGGGAGCTCCTGGTACTGG  | 544                   |
| 13   | AGCCCTGATGGAGGACT    | CTCCGCGTAGAGGTGTG    | 494                   |
| 14   | GGCTGCCACACCTTAGC    | CTCCTGAAGCAGCCTTCTCT | 480                   |
| 15   | TGTCCCTCCAGTCTCTCT   | CAGGAGAAGATGGTCCCAAG | 457                   |

All primer sequences are 5' to 3' direction. Annealing temperature for all primer pairs is 60°C.

**Supplemental Table 3.** Primer sequences for SCN5A (NM\_000335.4)

| Exon | Forward primer         | Reverse primer        | PCR product size (bp) |
|------|------------------------|-----------------------|-----------------------|
| 1    | AGCCTCTCTGCAAATGGTGT   | CACCCTAAATAGAGCCCCATA | 548                   |
| 2    | GGGCAAGGCAGTGAGTCTAC   | TAGGACCAGCAGGGAATCAG  | 431                   |
| 3    | GTCACAGCCCAGTGTGTC     | TTCCTCCCTAGAAGGCACAA  | 452                   |
| 4    | GGACACATGGCAGTTACACG   | AGGGAGGAAGCCAGAAAGAG  | 475                   |
| 5    | TTGTGGCTCTCGAACTTT     | GAGCCCTGGGAAAGGTATTTC | 421                   |
| 6    | CCAGGAGAAGCCTCCCTTAT   | AGGCCCTAAGTCTGCTACCC  | 539                   |
| 7    | ACTGGCAGCAGGATGTCTTC   | TGGGGTCAGGGCATAAATAG  | 379                   |
| 8    | ACAGCACGAACAAGTCACG    | ATCCCTTCTCCCTCAGAAGC  | 475                   |
| 9    | GCAGGTCAGTACATGTCCCTCT | CAGCAGGCACTGCACCAT    | 544                   |
| 10   | TGCTCTATTTTGGGGTAGG    | GAAACAGGAAGCGCAGAGAT  | 436                   |
| 11   | GCCCTCAATGCTCTGAGAAG   | TGGCACTGGTGATCAGTTTG  | 545                   |
| 12   | CCAGTGTCCCATCAAGACCT   | CAGGCCAGATGTGGGAGTAT  | 519                   |
| 13   | TCCAGATTAAGGAGCCAGGA   | CTGTGTGCAGGATCCCTTCT  | 528                   |
| 14   | CAGGCTGGAGAAGAGAGCTG   | GGTACCAAGCAATGGCTGT   | 495                   |
| 15   | GCTTTCAGGCAGGAGCTAGA   | CGGATGGGTAGATGGATTGA  | 550                   |
| 16-1 | GGTTAGGATGAGGGCTCAGG   | TGGTCATCTGTCTGACTCG   | 549                   |
| 16-2 | CCCCTGATGAGGACAGAGAG   | GCCTTCTACCCCTACCCACT  | 516                   |
| 17   | TTGCTTGGACCTACCAGGAG   | TGTACCGTCTCTCCCTGTC   | 545                   |
| 18   | AAAAGTGGCTCTGTGCAGGT   | CTGTTGGGCATACAGTGGTG  | 537                   |
| 19   | TCCATCCATCCTCCTCAAAG   | GGGGTTGAGAGTTTGTGAGC  | 547                   |
| 20   | GGCTGAAGCAGGAGAATCAC   | ACGTCCTCCTCCTCTCTGC   | 527                   |
| 21   | GACAGTCCACCCAGGACTA    | GGTTCTCACAGCTGCCTAGC  | 487                   |
| 22   | CTCCCTTGTGTGGGATCT     | CCTCTTCTGCCACATCAT    | 512                   |
| 23   | CCCACCCTAGTGCTAAACA    | GCATTCCAGAGAGGCTGAAC  | 394                   |
| 24   | TGGCCACAGACTCACATAA    | AGAAGAGGACCATCCCCAAC  | 426                   |
| 25   | TCAAGGTGAAAAGGGACAGG   | GGGCTGAAAGACTGTGAAGC  | 415                   |
| 26   | GGCTTTAGCCTCCAGGACTT   | GGTTGTACATGGCATTGAGC  | 537                   |
| 27-1 | AGCAGGCAGAGTCTAGCAT    | AGAGTGGGGTCGCAGTAGG   | 549                   |
| 27-2 | ACATCGGGCTGCTGCTCT     | GGCAGGTCCATGTTGATGA   | 547                   |
| 27-3 | CACCACCTACATCATCTCC    | CTGCTGACGGAAGAGGAAGG  | 538                   |
| 27-4 | AGATGGACGCCCTGAAGAT    | GCTGGTTTGTGACTGACTGC  | 535                   |

All primer sequences are 5' to 3' direction. Annealing temperature for all primer pairs is 60°C.
